# Supplementary material for: Plant Growth and Nutrient Composition of Shrub and Arbor Willows Grown in Cu-Contaminated Flooded Soil
Source: MDPI journal article supplement (doi:10.3390/f13070989), 2022-06-23
Supplement: s1 [file s1]

## Article

# Plant Growth and Nutrient Composition of Shrub and Arbor Willows Grown in Cu-Contaminated Flooded Soil

**Table S1.** Physical and chemical characteristics of the selected soil.

| Soil Parameters                         | Measured Value |
|-----------------------------------------|----------------|
| pH                                      | 6.9 ± 0.03     |
| Organic matter (g.kg <sup>-1</sup> )    | 2.8 ± 0.1      |
| Total nitrogen (g.kg <sup>-1</sup> )    | 1.3 ± 0.02     |
| Total phosphorus (g.kg <sup>-1</sup> )  | 1.2 ± 0.09     |
| Total potassium (g.kg <sup>-1</sup> )   | 26.1 ± 1.1     |
| Total copper (mg.kg <sup>-1</sup> )     | 239.5 ± 33.7   |
| Available copper (mg.kg <sup>-1</sup> ) | 43.3 ± 1.6     |

**Table S2.** The recovery data for the elemental analysis using inductively coupled plasma atomic emission spectrometry (ICP-AES).

|          | CRM               | Cu        | Mn       | Fe          | Mg (%)      | P (%)      | K (%)       | S (%)       | Ca (%)      |
|----------|-------------------|-----------|----------|-------------|-------------|------------|-------------|-------------|-------------|
| GB-07604 | Certified values  | 6.6 ± 1.0 | 61 ± 4   | 1070 ± 0.17 | 0.48 ± 0.03 | 0.1 ± 0.06 | 0.92 ± 0.07 | 0.73 ± 0.04 | 1.60 ± 0.12 |
|          | Measured value    | 6.4 ± 0.2 | 57 ± 2   | 983 ± 13    | 0.44 ± 0.02 | 0.1 ± 0.04 | 0.92 ± 0.06 | 0.71 ± 0.02 | 1.68 ± 0.08 |
|          | Recovery rate (%) | 96 ± 2.5  | 92 ± 1.5 | 103 ± 6.1   | 92 ± 0.01   | 103 ± 0.01 | 100 ± 0.04  | 97 ± 0.02   | 95 ± 0.43   |

**Table S3.** Correlations between DCB-Cu, DCB-Fe, DCB-Mn, and DCB-S.

|    | Cu       | Fe       | Mn       | S |
|----|----------|----------|----------|---|
| Cu | 1        |          |          |   |
| Fe | -0.97 ** | 1        |          |   |
| Mn | -0.98 ** | 0.94 **  | 1        |   |
| S  | 0.74 **  | -0.75 ** | -0.69 ** | 1 |

*p* values of the Pearson correlation analysis were also shown. \* *p* < 0.05, \*\* *p* < 0.01.

**Table S4.** Macroelements (K, Ca, Mg, S g.kg<sup>-1</sup>) in the dry weight plant tissues of *S.integra* ‘Yizhibi’ and *S.jiangsuensis* ‘J172’ exposed to Cu-contaminated soil as affected by soil flooding for 90 d.

| Elements | Plant Species                | Plant Tissues        |                      |                      |                      |                      |                      |                      |              |
|----------|------------------------------|----------------------|----------------------|----------------------|----------------------|----------------------|----------------------|----------------------|--------------|
|          |                              | Leaf                 | Stem                 |                      | Cutting              |                      | Root                 |                      |              |
|          |                              | Non-Flooded Flooding |              |
| K        | <i>S.integra</i> ‘Yizhibi’   | 14.2 ± 0.12c         | 16.7 ± 0.58a         | 3.9 ± 0.06b          | 3.0 ± 0.28c          | 3.7 ± 0.15b          | 3.3 ± 0.07c          | 7.4 ± 0.29c          | 8.4 ± 0.24b  |
|          | <i>S.jiangsuensis</i> ‘J172’ | 15.3 ± 0.12b         | 11.1 ± 0.02d         | 4.8 ± 0.23a          | 3.9 ± 0.11b          | 4.4 ± 0.07a          | 3.8 ± 0.11b          | 8.1 ± 0.08b          | 11.9 ± 0.30a |
| Ca       | <i>S.integra</i> ‘Yizhibi’   | 43.9 ± 0.71a         | 35.4 ± 1.5b          | 11.2 ± 0.13a         | 8.0 ± 0.77b          | 7.7 ± 0.21a          | 6.0 ± 0.15c          | 6.1 ± 0.11c          | 7.3 ± 0.11a  |
|          | <i>S.jiangsuensis</i> ‘J172’ | 28.1 ± 0.31c         | 26.3 ± 0.12d         | 6.8 ± 0.31c          | 5.6 ± 0.24d          | 6.8 ± 0.12b          | 4.9 ± 0.21d          | 6.4 ± 0.11b          | 6.4 ± 0.14b  |
| Mg       | <i>S.integra</i> ‘Yizhibi’   | 1.5 ± 0.02b          | 1.5 ± 0.06b          | 0.28 ± 0.00b         | 0.24 ± 0.02c         | 0.30 ± 0.01c         | 0.26 ± 0.01d         | 0.82 ± 0.03c         | 0.9 ± 0.02b  |
|          | <i>S.jiangsuensis</i> ‘J172’ | 1.8 ± 0.04a          | 1.8 ± 0.01a          | 0.37 ± 0.01a         | 0.36 ± 0.01a         | 0.38 ± 0.01a         | 0.35 ± 0.00b         | 0.94 ± 0.02b         | 1.2 ± 0.02a  |
| S        | <i>S.integra</i> ‘Yizhibi’   | 14.8 ± 0.22a         | 13.1 ± 0.53b         | 0.66 ± 0.01a         | 0.58 ± 0.05b         | 0.82 ± 0.03a         | 0.56 ± 0.01d         | 2.3 ± 0.06d          | 2.9 ± 0.10b  |
|          | <i>S.jiangsuensis</i> ‘J172’ | 10.3 ± 0.16d         | 11.6 ± 0.09c         | 0.47 ± 0.03c         | 0.47 ± 0.02c         | 0.67 ± 0.02c         | 0.74 ± 0.01b         | 2.8 ± 0.02c          | 4.7 ± 0.10a  |

Each value represents the mean of three replicates ± standard deviation. Different letters indicate significantly different values among the treatments and between the species (*p* < 0.05).

**Table S5.** Eigenvalues and variance of Principal Component Analysis for elements.

| Elements:Cu | Eigenvalues | Variance (%) | Cumulative (%) | PC1   | PC2    |
|-------------|-------------|--------------|----------------|-------|--------|
| Fe:Cu       | 8.072       | 89.687       | 89.687         | 0.217 | −0.870 |
| Mn:Cu       | 0.784       | 8.714        | 98.401         | 0.337 | −0.214 |
| K:Cu        | 0.101       | 1.119        | 99.521         | 0.350 | 0.111  |
| Ca:Cu       | 0.030       | 0.329        | 99.850         | 0.349 | 0.137  |
| S:Cu        | 0.008       | 0.094        | 99.945         | 0.346 | −0.123 |
| Mg:Cu       | 0.003       | 0.035        | 99.980         | 0.350 | −0.003 |
| C:Cu        | 0.001       | 0.013        | 99.992         | 0.337 | 0.279  |
| N:Cu        | 4.937E-4    | 0.005        | 99.998         | 0.349 | 0.126  |
| P:Cu        | 1.905E-4    | 0.002        | 100.000        | 0.342 | 0.239  |

**Table S6.** Summary of the two-way ANOVA for C, N, and P and their corresponding stoichiometric ratios in different plant tissues as affected by species and flooding.

| Variable                 | Species |         | Treatment |         | Species × Treatment |         |
|--------------------------|---------|---------|-----------|---------|---------------------|---------|
|                          | F-Value | p-Value | F-Value   | p-Value | F-Value             | p-Value |
| Leaf C concentrations    | 2.82    | >0.05   | 0.79      | >0.05   | 0.37                | >0.05   |
| Stem C concentrations    | 9.04    | 0.0200  | 4.94      | >0.05   | 2.12                | >0.05   |
| Cutting C concentrations | 1.46    | >0.05   | 4.98      | >0.05   | 0.01                | >0.05   |
| Root C concentrations    | 0.43    | >0.05   | 1.80      | >0.05   | 0.02                | >0.05   |
| Leaf N concentrations    | 261.50  | 0.0393  | 12.35     | >0.05   | 2.34                | >0.05   |
| Stem N concentrations    | 323.65  | 0.0354  | 7.28      | >0.05   | 0.16                | >0.05   |
| Cutting N concentrations | 191.21  | 0.0001  | 33.28     | 0.0004  | 122.78              | 0.0001  |
| Root N concentrations    | 26.37   | 0.0009  | 33.47     | 0.0004  | 65.40               | 0.0001  |
| Leaf P concentrations    | 46.57   | 0.0001  | 648.69    | 0.0001  | 25.95               | 0.0009  |
| Stem P concentrations    | 81.33   | 0.0001  | 93.76     | 0.0001  | 1.26                | >0.05   |
| Cutting P concentrations | 0.14    | >0.05   | 9.51      | 0.0150  | 13.97               | 0.0057  |
| Root P concentrations    | 69.35   | >0.05   | 163.70    | >0.05   | 44.90               | 0.0002  |
| Leaf C:N ratio           | 153.37  | 0.0001  | 1.73      | >0.05   | 0.71                | >0.05   |
| Stem C:N ratio           | 32.70   | 0.0004  | 0.004     | >0.05   | 0.024               | >0.05   |
| Cutting C:N ratio        | 69.33   | 0.0001  | 35.57     | 0.0003  | 58.27               | 0.0001  |
| Root C:N ratio           | 5.87    | 0.0417  | 9.88      | 0.0137  | 7.88                | 0.0230  |
| Leaf C:P ratio           | 29.57   | 0.0006  | 385.72    | 0.0001  | 5.10                | >0.05   |
| Stem C:P ratio           | 58.20   | 0.0001  | 62.94     | 0.0001  | 0.31                | >0.05   |
| Cutting C:P ratio        | 0.01    | >0.05   | 1.99      | >0.05   | 7.76                | 0.0237  |
| Root C:P ratio           | 26.69   | 0.0009  | 53.29     | 0.0001  | 10.79               | 0.0111  |
| Leaf N:P ratio           | 111.29  | 0.0001  | 1304.85   | 0.0001  | 51.25               | 0.0001  |
| Stem N:P ratio           | 361.84  | 0.0001  | 168.72    | 0.0001  | 3.95                | >0.05   |
| Cutting N:P ratio        | 18.79   | 0.0025  | 17.56     | 0.0030  | 47.89               | 0.0001  |
| Root N:P ratio           | 28.67   | 0.0007  | 246.16    | 0.0001  | 3.04                | >0.05   |

**Table S7.** Summary of the two-way ANOVA for element:Cu ratios in different plant tissues as affected by species and flooding.

| Variable            | Species |         | Treatment |         | Species × Treatment |         |
|---------------------|---------|---------|-----------|---------|---------------------|---------|
|                     | F-Value | p-Value | F-Value   | p-Value | F-Value             | p-Value |
| Leaf C:Cu ratio     | 170     | 0.0001  | 4376      | 0.0001  | 628                 | 0.0001  |
| Stem C:Cu ratio     | 41,359  | 0.0001  | 615       | 0.0001  | 8591                | 0.0001  |
| Cutting C:Cu ratio  | 16,556  | 0.0001  | 2557      | 0.0001  | 307                 | 0.0001  |
| Root C:Cu ratio     | 6762    | 0.0001  | 3234      | 0.0001  | 1989                | 0.0001  |
| Leaf N:Cu ratio     | 205     | 0.0001  | 4072      | 0.0001  | 962                 | 0.0001  |
| Stem N:Cu ratio     | 3429    | 0.0001  | 1.19      | >0.05   | 714                 | 0.0001  |
| Cutting N:Cu ratio  | 5226    | 0.0001  | 228       | 0.0001  | 369                 | 0.0001  |
| Root N:Cu ratio     | 8133    | 0.0001  | 3844      | 0.0001  | 2162                | 0.0001  |
| Leaf P:Cu ratio     | 251     | 0.0001  | 1319      | 0.0001  | 175                 | 0.0001  |
| Stem P:Cu ratio     | 1065    | 0.0001  | 167       | 0.0001  | 346                 | 0.0001  |
| Cutting P:Cu ratio  | 931     | 0.0001  | 159       | 0.0001  | 0.05                | >0.05   |
| Root P:Cu ratio     | 4001    | 0.0001  | 888       | 0.0001  | 580                 | 0.0001  |
| Leaf K:Cu ratio     | 147     | 0.0001  | 5663      | 0.0001  | 3367                | 0.0001  |
| Stem K:Cu ratio     | 1265    | 0.0001  | 337       | 0.0001  | 179                 | 0.0001  |
| Cutting K:Cu ratio  | 1857    | 0.0001  | 964       | 0.0001  | 40                  | 0.0002  |
| Root K:Cu ratio     | 9127    | 0.0001  | 4769      | 0.0001  | 2927                | 0.0001  |
| Leaf Ca:Cu ratio    | 53      | 0.0001  | 2511      | 0.0001  | 596                 | 0.0001  |
| Stem Ca:Cu ratio    | 1292    | 0.0001  | 34        | 0.0004  | 376                 | 0.0001  |
| Cutting Ca:Cu ratio | 806     | 0.0001  | 72        | 0.0001  | 9.94                | 0.0135  |
| Root Ca:Cu ratio    | 4966    | 0.0001  | 1891      | 0.0001  | 1055                | 0.0001  |
| Leaf Mg:Cu ratio    | 108     | 0.0001  | 4307      | 0.0001  | 322                 | 0.0001  |
| Stem Mg:Cu ratio    | 659     | 0.0001  | 191       | 0.0001  | 106                 | 0.0001  |
| Cutting Mg:Cu ratio | 820     | 0.0001  | 855       | 0.0001  | 66                  | 0.0001  |
| Root Mg:Cu ratio    | 14,697  | 0.0001  | 8312      | 0.0001  | 4241                | 0.0001  |
| Leaf S:Cu ratio     | 286     | 0.0001  | 3144      | 0.0001  | 363                 | 0.0001  |
| Stem S:Cu ratio     | 875     | 0.0001  | 13        | 0.0070  | 186                 | 0.0001  |
| Cutting S:Cu ratio  | 1302    | 0.0001  | 481       | 0.0001  | 545                 | 0.0001  |
| Root S:Cu ratio     | 8841    | 0.0001  | 4555      | 0.0001  | 2404                | 0.0001  |
| Leaf Fe:Cu ratio    | 152     | 0.0001  | 135       | 0.0001  | 18                  | 0.0027  |
| Stem Fe:Cu ratio    | 465     | 0.0001  | 8.92      | 0.0174  | 22                  | 0.0015  |
| Cutting Fe:Cu ratio | 5332    | 0.0001  | 544       | 0.0001  | 71                  | 0.0001  |
| Root Fe:Cu ratio    | 29,217  | 0.0001  | 4872      | 0.0001  | 1826                | 0.0001  |
| Leaf Mn:Cu ratio    | 79      | 0.0001  | 3107      | 0.0001  | 296                 | 0.0001  |
| Stem Mn:Cu ratio    | 445     | 0.0001  | 58        | 0.0001  | 329                 | 0.0001  |
| Cutting Mn:Cu ratio | 2458    | 0.0001  | 308       | 0.0001  | 96                  | 0.0001  |
| Root Mn:Cu ratio    | 29,431  | 0.0001  | 3111      | 0.0001  | 758                 | 0.0001  |
